# Supplementary material for: New fossil assemblages from the Early Ordovician Fezouata Biota
Source: Research Square preprint supplement (doi:10.21203/rs.3.rs-1233271/v1), 2022-01-12
Supplement: Supplementary file 1 [file 0567205162b22fd512976623.pdf]

Table summarizing the main characteristics of the new site in Taichoute in comparison to more classical Fezouata Sites.

|                                                       | <b>Previously described<br/>Fezouata Shale sites</b>                                                                                        | <b>This study<br/>(Taichoute)</b>                                                                                                                                           |
|-------------------------------------------------------|---------------------------------------------------------------------------------------------------------------------------------------------|-----------------------------------------------------------------------------------------------------------------------------------------------------------------------------|
| <b>Location</b>                                       | Zagora Region, Morocco                                                                                                                      | Taichoute, 80km from Zagora, Morocco                                                                                                                                        |
| <b>Age</b>                                            | Early Ordovician<br>upper Tremadocian and middle Floian                                                                                     | Early Ordovician<br>middle to upper Floian                                                                                                                                  |
| <b>Mechanism for<br/>exceptional<br/>preservation</b> | <i>In situ</i> burial of animals under storm<br>induced deposits close to the storm wave<br>base                                            | Animals transported by density flows and<br>deposited well below the storm wave base                                                                                        |
| <b>Mode of<br/>exceptional<br/>preservation</b>       | Burgess Shale-type (BST) preservation<br>including weathered carbonaceous<br>compressions and authigenic minerals;<br>very rare concretions | Solely in concretions                                                                                                                                                       |
| <b>Exceptional<br/>fossil<br/>occurrences</b>         | Echinoderms, numerous arthropods,<br>sponges, etc.                                                                                          | Giant radiodonts and bivalved euarthropods<br>(new taxa, yet to be described)                                                                                               |
| <b>Significance</b>                                   | Mixture of Cambrian and Palaeozoic<br>fauna, while still showing the Cambrian<br>BST mode of preservation.                                  | Closure of the Cambrian BST mode of<br>preservation (no carbonaceous compression);<br>top of the locality has only classical Palaeozoic<br>taxa (brachiopods and bryozoans) |
| <b>Conclusion</b>                                     | The Fezouata Shale is a unique window that records the gradual transition between the<br>Cambrian Explosion and Ordovician Radiation.       |                                                                                                                                                                             |
